# Supplementary material for: Supported gold nanoparticle catalyst for the selective oxidation of silanes to silanols in water
Source: Royal Society of Chemistry journal article supplement (doi:10.1039/b910208f), 2009-01-01
Supplement: b910208f.pdf [file b910208f.pdf]

## Supplementary Information

### Supported Gold Nanoparticles Catalyst for the Selective Oxidation of Silanes to Silanols in Water

Takato Mitsudome,<sup>a</sup> Akifumi Noujima,<sup>a</sup> Tomoo Mizugaki,<sup>a</sup> Koichiro Jitsukawa,<sup>a</sup> and  
Kiyotomi Kaneda<sup>\*a,b</sup>

<sup>a</sup> Department of Materials Engineering Science, Graduate School of Engineering Science, Osaka  
University, 1-3 Machikaneyama, Toyonaka, Osaka, 560-8531, Japan.

E-mail: kaneda@cheng.es.osaka-u.ac.jp; Fax: +81 6-6850-6260; Tel: +81 6-6850-6260

<sup>b</sup> Research Center for Solar Energy Chemistry, Osaka University, 1-3 Machikaneyama, Toyonaka, Osaka,  
560-8531, Japan

#### Contents

|                                 |           |
|---------------------------------|-----------|
| <b>Experimental</b>             | <b>2S</b> |
| <b>NMR data</b>                 | <b>3S</b> |
| <b>EXAFS spectra of AuHAP</b>   | <b>8S</b> |
| <b>TEM measurement of AuHAP</b> | <b>9S</b> |

## Experimental

### 1) General

All organic reagents were purified before use.  $\text{HAuCl}_4 \cdot x\text{H}_2\text{O}$  was obtained from N. E. Chemcat Co. Ltd.. GC-FID and GC-MS were performed on Shimadzu GC-2014: Silicone OV-17 (2 m) and Shimadzu GC-17A: URBON Capillary Column HR-1 (30 m  $\times$  0.25 mm  $\times$  0.25  $\mu\text{m}$ ). LC was performed on Shimadzu LC-10ADvp: STR ODS-II (150mm  $\times$  4 mm).  $^1\text{H}$  and  $^{13}\text{C}$  NMR spectra were recorded on JNM-AL400 and 270. HRMS spectra of silanols were recorded on JEOL the MStation JMS-700. X-ray diffraction (XRD) was measured using an X'pert diffractometer (Phillips Co. Ltd.). Inductively coupled plasma measurement was performed by Nippon Jarrell-Ash ICAP-575 Mark II. Au L-edge X-ray absorption spectra were recorded at room temperature using a fluorescence-yield collection technique at the beam line 01B1 station attached with Si (111) monochromator at SPring-8, JASRI, Harima, Japan. Details of data analysis were performed using the REX 2000 program ver. 2.0.4 (RIGAKU). Fourier transformation (FT) of  $k^3$ -weighted EXAFS data was performed to obtain the radial structural function.

**2) A typical procedure for the oxidation of triethylsilane by AuHAP:** AuHAP (0.10 g, 0.0083 mmol Au) was placed in a Schlenk tube equipped with a reflux condenser. Water (3 mL) and triethylsilane (1.0 mmol) were added, and the reaction mixture was vigorously stirred at 80 °C under air for 2 h. After the oxidation reaction, the product was extracted with diethylether. The yield was determined by GC analysis with naphthalene as an internal standard (Shimadzu GC-2014, carrier gas:  $\text{N}_2$  (100 kPa), column: Silicone OV-17 (2 m); oven temperature program: from 100 °C, 6 °C/min up to 220 °C, injection and detection temperature: 270 °C, retention time: triethylsilane (2.9 min), triethylsilanol (4.9 min), standard naphthalene (13.2 min), hexaethylidisiloxane (11.4 min)).

**3) Product identification:** the products except for tripropylsilanol, tributylsilanol, triisobutylsilanol, trihexylsilanol, dimethylpropenylsilanol, 1,1-dimethylphenylmethylsilanol are commercially available. The products (silanols and disiloxanes) were determined by GC [Silicone OV-17 (2 m); oven temperature program: from 100 °C to 220 °C], GC-MS [URBON Capillary Column HR-1(30 m × 0.25 mm × 0.25 μm); 100 °C (5 min) temperature programmed from 100 °C to 250 °C (30 °C/min); He carrier 1.3 mL/min.], LC [STR ODS-II(150 mm × 4 mm); detection at 254 nm, flow rate 1.0 mL/min, eluent: methanol/water (70 / 30)], NMR, and HRMS. GC and/or LC retention times and <sup>1</sup>H and <sup>13</sup>C NMR chemical shifts of products agreed with those of authentic samples.

**4) Reuse experiment for the oxidation of triethylsilane:** Fresh oxidation reaction using triethylsilane (1 mmol), water (3 mL), and AuHAP (0.1 g) was carried out at 80 °C under air condition (See A typical procedure for the oxidation of triethylsilane by AuHAP in 2S). After 2 h, the reaction mixture was cooled to room temperature. Next, diethyl ether was added to the reaction mixture and then, the organic phase containing triethylsilanol was decanted (5 mL × 3). The residual aqueous phase containing AuHAP was subjected to the reuse experiment; another portion of triethylsilane (1 mmol) was successively added into the residual aqueous phase containing AuHAP, followed by stirring under identical conditions.

#### NMR data

triethylsilanol: CAS registry No. [597-52-4] (Table 2, Entry 1)

Products were determined by GC; retention times:  $t_R = 4.9$  min for triethylsilanol and  $t_R = 11.4$  min for hexaethyldisiloxane. <sup>1</sup>H NMR and <sup>13</sup>C NMR were consistent with previously reported values.<sup>1S,</sup>

*tert*-butyldimethylsilanol: CAS registry No. [18173-64-3] (Entry 2)

Products were determined by GC; retention times:  $t_R = 3.6$  min for *tert*-butyldimethylsilanol and  $t_R = 10.2$  min for 1,3-bis(*tert*-butyl)-1,1,3,3-tetramethyl-disiloxane.  $^1\text{H}$  NMR (270 MHz,  $\text{CDCl}_3$ )  $\delta$  2.25 (bs, 1H), 0.90 (s, 9H), 0.08 (s, 6H);  $^{13}\text{C}$  NMR (67.8 MHz,  $\text{CDCl}_3$ )  $\delta$  25.7, 18.1, -3.5.

tributylsilanol: CAS registry No. [18388-85-4] (Entry 3)

Products were determined by GC; retention times:  $t_R = 10.8$  min for tributylsilanol and  $t_R = 16.0$  min for hexabutyldisiloxane.  $^1\text{H}$  NMR(270 MHz,  $\text{CDCl}_3$ )  $\delta$  1.92 (bs, 1H), 1.26-1.42 (m, 12H), 0.89 (t, 9H,  $J = 6.6$  Hz), 0.59 (t, 6H,  $J = 7.2$  Hz);  $^{13}\text{C}$  NMR (67.8 MHz,  $\text{CDCl}_3$ )  $\delta$  26.6, 25.4, 14.9, 13.8. HRMS (EI) exact mass calcd for ( $\text{C}_{12}\text{H}_{28}\text{OSi}$ ) requires  $m/z$  216.1909, found  $m/z$  216.1886.

trihexylsilanol: CAS registry No. [60782-58-3] (Entry 4)

Products were determined by GC; retention times:  $t_R = 14.0$  min for trihexylsilanol.  $^1\text{H}$  NMR and  $^{13}\text{C}$  NMR were consistent with previously reported values.<sup>15</sup> HRMS (EI) exact mass calcd for ( $\text{C}_{18}\text{H}_{40}\text{OSi}$ ) requires  $m/z$  300.2848, found  $m/z$  300.2834.

triisobutylsilanol: CAS registry No. [317374-14-4] (Entry 5)

Products were determined by GC; retention times:  $t_R = 10.0$  min for triisobutylsilanol and  $t_R = 15.0$  min for hexaisobutyldisiloxane.  $^1\text{H}$  NMR and  $^{13}\text{C}$  NMR were consistent with previously reported values.<sup>25</sup>

triisopropylsilanol: CAS registry No. [17877-23-5] (Entry 6)

Products were determined by GC; retention times:  $t_R = 7.1$  min for triisopropylsilanol and  $t_R = 12.8$  min for hexaisopropyldisiloxane.  $^1\text{H}$  NMR and  $^{13}\text{C}$  NMR were consistent with previously reported values.<sup>15</sup> HRMS (EI) exact mass calcd for ( $\text{C}_9\text{H}_{22}\text{OSi}$ ) requires  $m/z$  174.1440, found  $m/z$  174.1425.

tripropylsilanol; CAS registry No. [17888-60-7] (Entry 7)

Products were determined by GC; retention times:  $t_R = 7.3$  min for tripropylsilanol and  $t_R = 13.5$  min for hexapropyldisiloxane.  $^1\text{H}$  NMR (270 MHz,  $\text{CDCl}_3$ )  $\delta$  1.32-1.46 (m, 6H), 0.97 (t,  $J = 7.2$  Hz, 9H), 0.56-0.62 (m, 6H);  $^{13}\text{C}$  NMR (67.8 MHz,  $\text{CDCl}_3$ )  $\delta$  18.3, 18.0, 16.7. HRMS (EI) exact mass calcd for ( $\text{C}_9\text{H}_{22}\text{OSi}$ ) requires  $m/z$  174.1440, found  $m/z$  174.1430.

dimethylpropenylsilanol: CAS registry No. [64185-05-3] (Entry 8)

Product was determined by GC; retention times:  $t_R = 3.2$  min for dimethylpropenylsilanol.  $^1\text{H}$  NMR (270 MHz,  $\text{CDCl}_3$ )  $\delta$  5.75-5.91 (m, 1H), 4.87-4.96 (m, 2H), 2.02 (bs, 1H), 1.62 (d,  $J = 6.9$  Hz, 2H), 0.16 (s, 6H);  $^{13}\text{C}$  NMR (67.8 MHz,  $\text{CDCl}_3$ )  $\delta$  134.5, 114.3, 26.4, 0.0.

cyclohexyldimethylsilanol: CAS registry No. [274676-43-6] (Entry 9)

Product was determined by GC; retention times:  $t_R = 7.2$  min for cyclohexyldimethylsilanol and  $t_R = 13.1$  min for 1,1,3,3-tetramethyl-1,3-dicyclohexyldisiloxane.  $^1\text{H}$  NMR (270 MHz,  $\text{CDCl}_3$ )  $\delta$  1.60-1.74 (m, 5H), 1.01-1.13 (m, 5H), 0.55-0.59 (m, 1H), 0.08 (s, 6H);  $^{13}\text{C}$  NMR (67.8 MHz,  $\text{CDCl}_3$ )  $\delta$  27.9, 27.5, 27.0, 26.8, -2.2. HRMS (EI) exact mass calcd for ( $\text{C}_8\text{H}_{18}\text{OSi}$ ) requires  $m/z$  158.1127, found  $m/z$  158.1113.

1,1-dimethylphenylmethylsilanol: CAS registry No. [56633-16-0] (Entry 10)

Products were determined by GC; retention times:  $t_R = 9.4$  min for 1,1-dimethylphenylmethylsilanol and  $t_R = 16.2$  min for 1,1,3,3-tetramethyl-1,3-bis(phenylmethyl) disiloxane.  $^1\text{H}$  NMR (270 MHz,  $\text{CDCl}_3$ )  $\delta$  6.99-7.37 (m, 5H), 2.09 (s, 2H), 0.08 (s, 6H);  $^{13}\text{C}$  NMR (67.8 MHz,  $\text{CDCl}_3$ )  $\delta$  145.5, 130.0, 129.8, 125.7, 29.6, 0.0. HRMS (EI) exact mass calcd for ( $\text{C}_9\text{H}_{14}\text{OSi}$ ) requires  $m/z$  166.0814, found  $m/z$  166.0795.

dimethylphenylsilanol: CAS registry No. [5272-18-4] (Entry 11)

Products were determined by GC; retention times:  $t_R = 5.1$  min for dimethylphenylsilanol and  $t_R = 10.2$  min for 1,1,3,3-tetramethyl-1,3-diphenyldisiloxane; CAS registry No. [56-33-7].  $^1\text{H}$  NMR and  $^{13}\text{C}$  NMR were consistent with previously reported values.<sup>3S, 4S</sup>

diphenylmethylsilanol: CAS registry No. [778-25-6] (Entry 12)

Products were determined by GC; retention times:  $t_R = 10.0$  min for diphenylmethylsilanol and  $t_R = 20.0$  min for 1,1,3,3-tetraphenyl-1,3-dimethyldisiloxane.  $^1\text{H}$  NMR,  $^{13}\text{C}$  NMR were consistent with previously reported values.<sup>3S</sup>

triphenylsilanol: CAS registry No. [791-31-1] (Entries 13 and 14)

Products were determined by LC; retention times:  $t_R = 1.9$  min for triphenylsilanol and  $t_R = 3.5$  min for hexaphenyldisiloxane.  $^1\text{H}$  NMR and  $^{13}\text{C}$  NMR were consistent with previously reported values.<sup>3S</sup>

diphenylsilanediol: CAS registry No. [947-42-2] (Entry 15)

Product was determined by LC; retention times:  $t_R = 1.6$  min for diphenylsilanediol.  $^1\text{H}$  NMR and  $^{13}\text{C}$  NMR were consistent with previously reported values.<sup>3S</sup>

1,4-bis(hydroxydimethylsilyl) benzene: CAS registry No. [2754-32-7] (Entry 16)

Product was determined by LC; retention times:  $t_R = 1.7$  min for 1,4-bis(hydroxydimethylsilyl) benzene.  $^1\text{H}$  NMR and  $^{13}\text{C}$  NMR were consistent with previously reported values.<sup>5S</sup>

dimethyl(4-methylphenyl) silanol: CAS registry No. [17920-15-9] (Entry 17)

Products were determined by GC; retention times:  $t_R = 6.7$  min for dimethyl(4-methylphenyl) silanol

and  $t_R = 11.1$  min for 1,1,3,3-tetramethyl-1,3-bis (4-methylphenyl)disiloxane.  $^1\text{H}$  NMR,  $^{13}\text{C}$  NMR were consistent with previously reported values.<sup>6S</sup>

dimethyl(4-methoxyphenyl) silanol: CAS registry No. [22868-26-4] (Entry 18)

Products were determined by GC; retention times:  $t_R = 8.1$  min for dimethyl(4-methoxyphenyl) silanol and  $t_R = 12.9$  min for 1,1,3,3-tetramethyl-1,3-bis (4-methoxyphenyl)disiloxane.  $^1\text{H}$  NMR and  $^{13}\text{C}$  NMR were consistent with previously reported values.<sup>2S</sup>

dimethyl(4-chlorophenyl)silanol: CAS registry No. [18246-04-3] (Entry 19)

Products were determined by GC; retention times:  $t_R = 7.6$  min for dimethyl(4-chlorophenyl)silanol and  $t_R = 12.2$  min for 1,1,3,3-tetramethyl-1,3-bis(4-chlorophenyl) disiloxane.  $^1\text{H}$  NMR and  $^{13}\text{C}$  NMR were consistent with previously reported values.<sup>5S</sup>

#### Reference

- 1S H. Tan, A. Yoshikawa, M. S. Gordon and J. H. Espenson, *Organometallics*, 1999, **18**, 4753.
- 2S M. Lee, S. Ko and S. Chang, *J. Am. Chem. Soc.*, 2000, **122**, 12011.
- 3S Y. Lee, D. Seomoon, S. Kim, H. Han, S. Chang and P. H. Lee, *J. Org. Chem.*, 2004, **69**, 1741.
- 4S I. Fleming, R. S. Roberts and S. C. Smith, *J. Chem. Soc. Perkin Trans.1*, 1998, 1209.
- 5S T. Mistudome, S. Arita, H. Mori, T. Mizugaki, K. Jitsukawa and K. Kaneda, *Angew. Chem. Int. Ed.*, 2008, **47**, 7938.
- 6S S. E. Denmark and J. M. Kallemeyn, *Org. Lett.*, 2003, **5**, 3483.

EXAFS

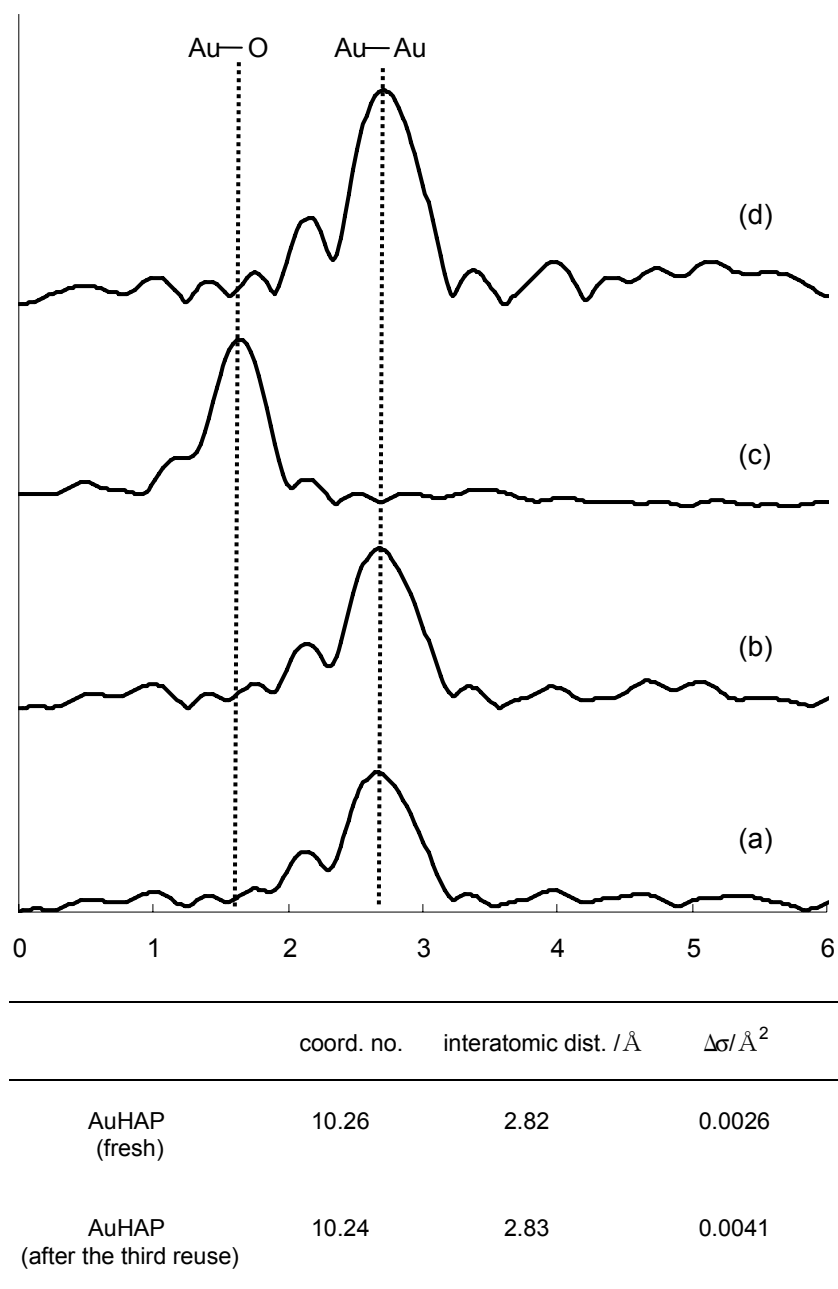

**Figure 1S** Fourier transformation of  $k^3$ -weighted Au L-edge EXAFS of (a) fresh AuHAP, (b) AuHAP after the third reaction, (c) Au<sub>2</sub>O<sub>3</sub>, and (d) Au foil.



TEM

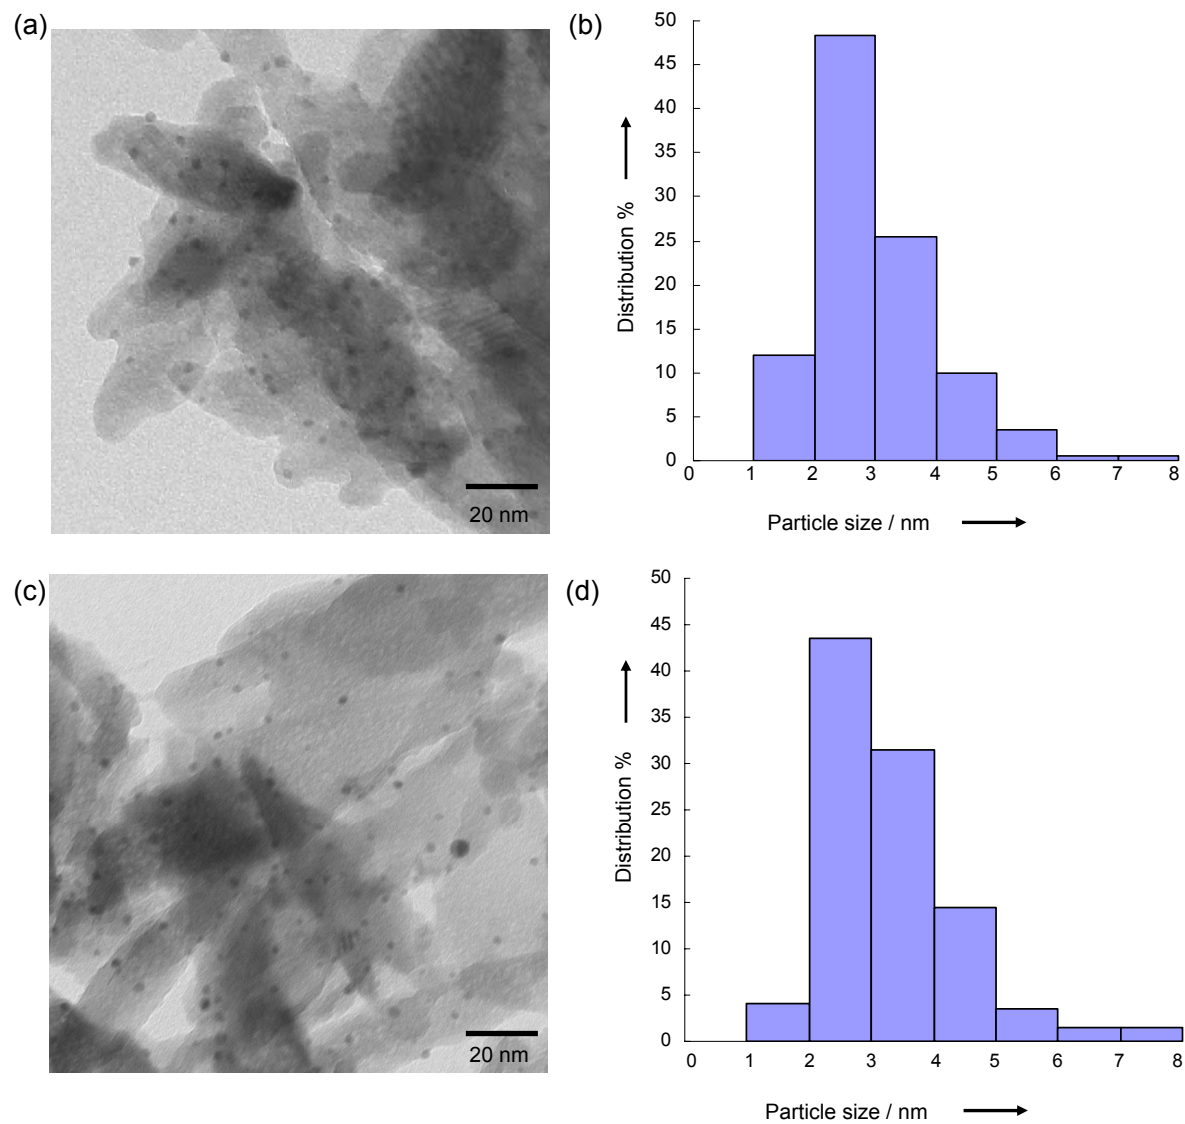

**Figure 2S** (a) TEM image of AuHAP, and (b) their size distribution diagram.

(c) TEM image of AuHAP after reuse experiment, and (d) their size distribution diagram.
